# Supplementary material for: p-Coumaroyl-CoA:monolignol transferase (PMT) acts specifically in the lignin biosynthetic pathway in Brachypodium distachyon
Source: PubMed Central journal article supplement — Plant J. 2014 Feb 12;77(5):713–26. doi: 10.1111/tpj.12420 (PMC4282527; doi:10.1111/tpj.12420), 2014-02-12
Supplement: tpj0077-0713-SD1.pdf [file tpj0077-0713-SD1.pdf]

# SUPPLEMENTARY MATERIAL

## **Misregulation of *p-Coumaroyl-CoA:Monolignol Transferase* in *Brachypodium distachyon***

Deborah L. Petrik<sup>1</sup>, Steven D. Karlen<sup>2</sup>, Cynthia L. Cass<sup>1</sup>, Dharshana Padmakshan<sup>2</sup>, Fachuang Lu<sup>2</sup>, Sarah Liu<sup>2</sup>, Philippe Le Bris<sup>5</sup>, Sébastien Antelme<sup>5</sup>, Nick Santoro<sup>3</sup>, Curtis G. Wilkerson<sup>4</sup>, Richard Sibout<sup>5</sup>, Catherine Lapi-erre<sup>5</sup>, John Ralph<sup>2</sup>, and John C. Sedbrook<sup>1</sup>

<sup>1</sup>School of Biological Sciences, Illinois State University, Normal, IL 61790 USA and Department of Energy Great Lakes Bioenergy Research Center, Madison, WI 53706 USA

<sup>2</sup>Department of Biochemistry, and the Department of Energy's Great Lakes Bioenergy Research Center, the Wisconsin Energy Institute, University of Wisconsin, Madison, WI 53726 USA

<sup>3</sup>Department of Energy's Great Lakes Bioenergy Research Center, Michigan State University, East Lansing, Michigan 48824 USA

<sup>4</sup>Department of Plant Biology, Department of Biochemistry and Molecular Biology, and the Department of Energy's Great Lakes Bioenergy Research Center, Michigan State University, East Lansing, Michigan 48824 USA

<sup>5</sup>INRA, Institut Jean-Pierre Bourgin (IJPB) UMR1318, Saclay Plant Science, 78000 Versailles, France; AgroParisTech, Institut Jean-Pierre Bourgin (IJPB) UMR1318, Saclay Plant Science, 78000 Versailles, France

Address for correspondence: John Sedbrook, School of Biological Sciences, Illinois State University, Normal, IL 61790, phone 309-438-3374, fax 309-438-3722, email [jcsedbr@ilstu.edu](mailto:jcsedbr@ilstu.edu)

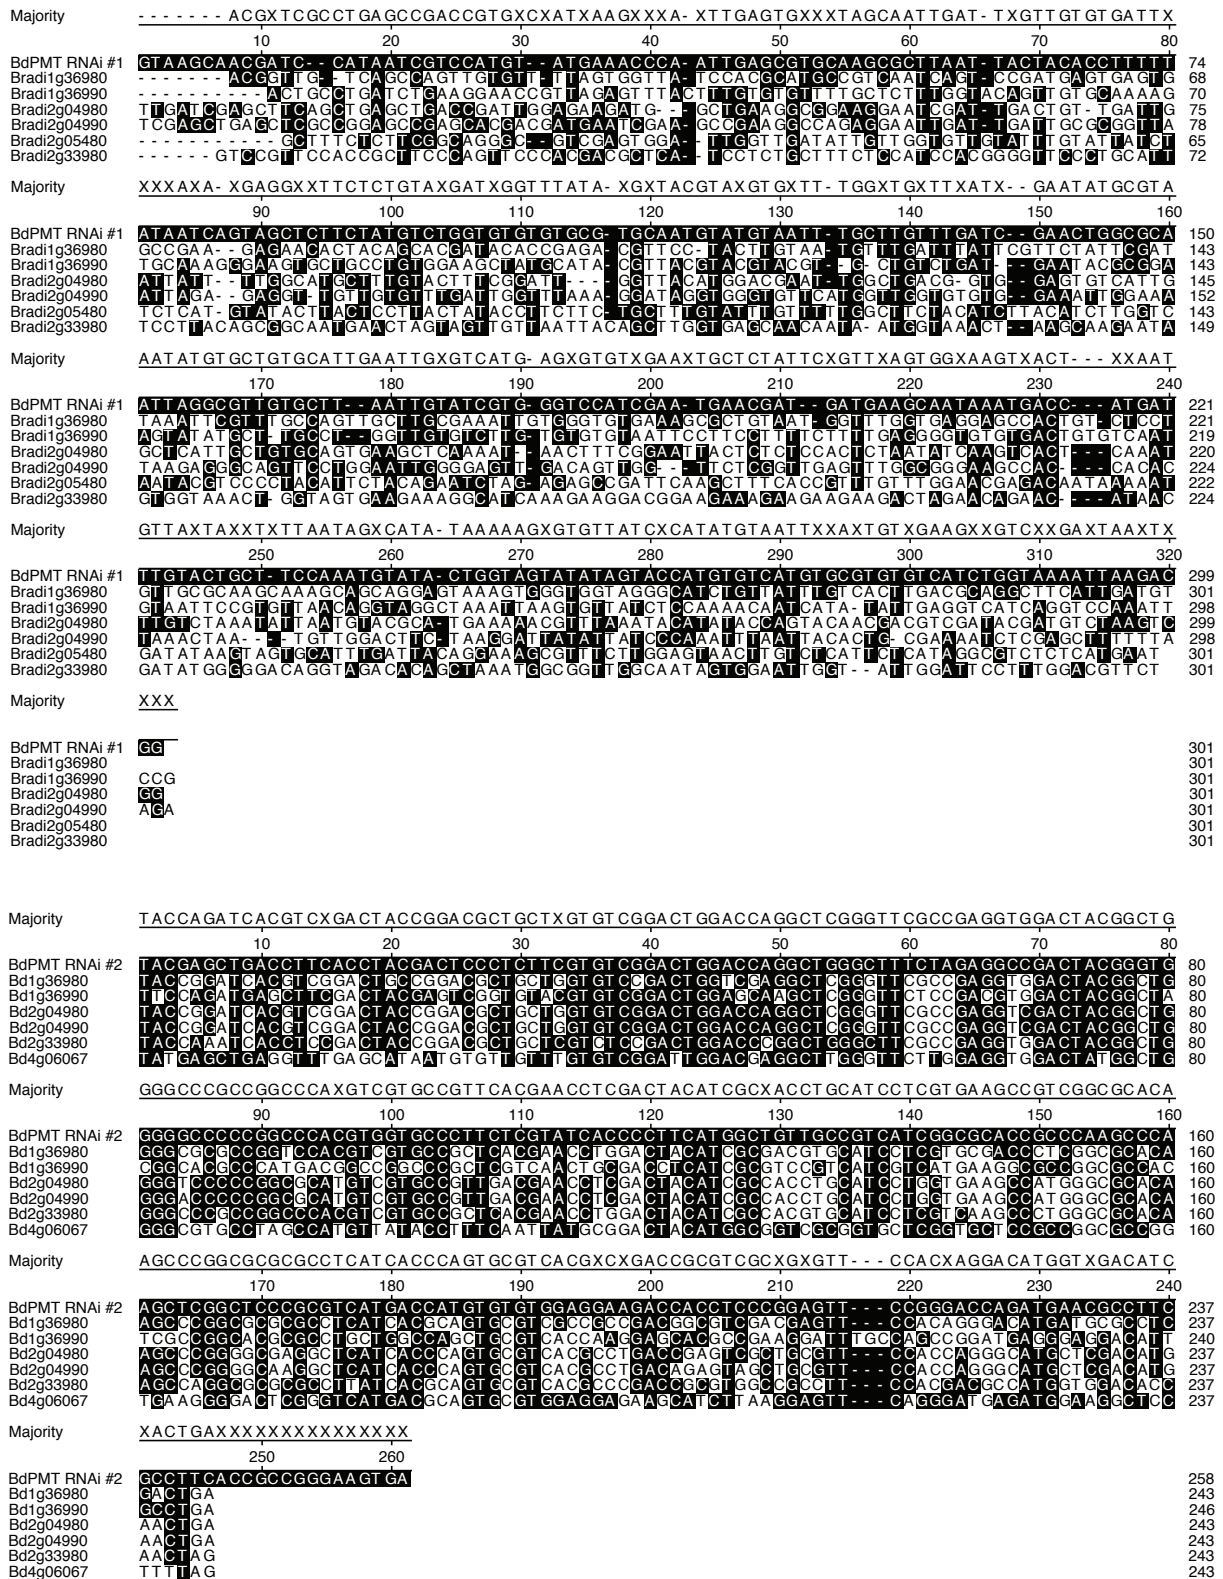

**Figure S1.** Clustal W alignments of the nucleotide sequences comprising *BdPMT* RNAi constructs #1 (top alignment) and #2 (bottom alignment) with the coding sequences of closely related Brachypodium *BdPMT*-like genes. Nucleotides in black boxes are identical to the corresponding *BdPMT* sequences.

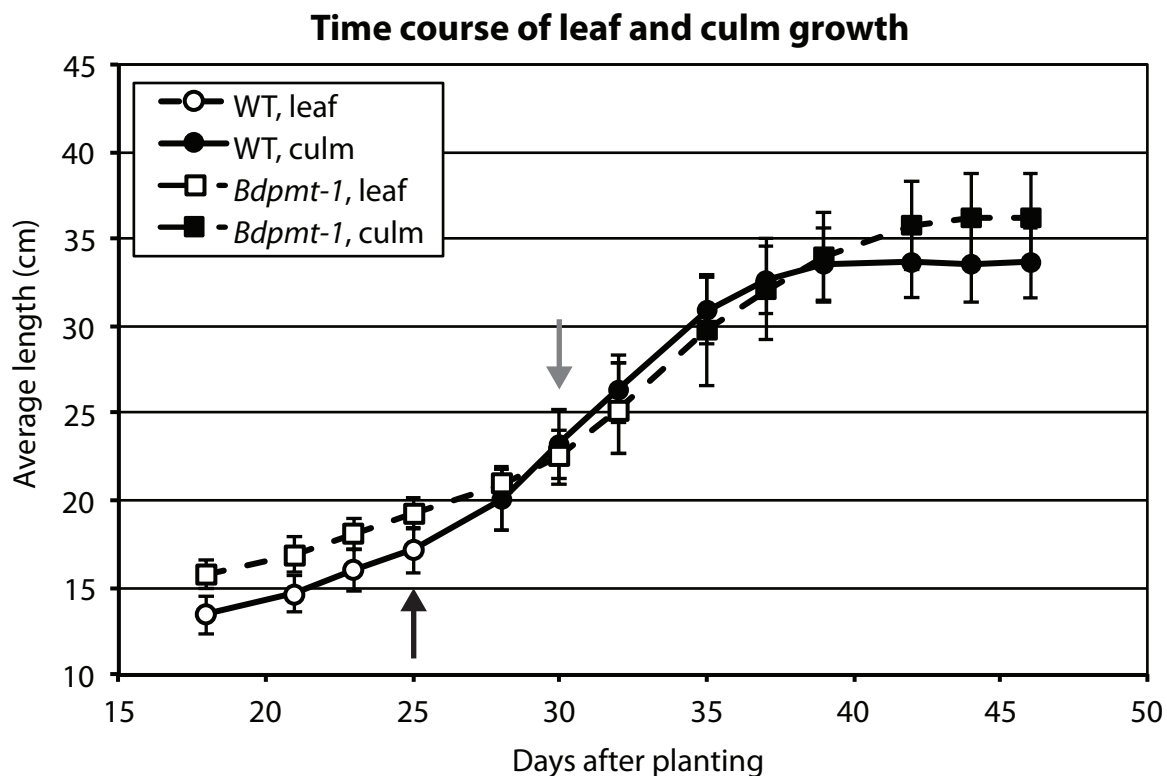

**Figure S2.** Time course growth measurements of *Bdpmt-1* (squares) and WT (circles) plants in soil. Arrows delineate the time points at which 50% of the spikelets could be seen emerging from the leaf whorl (black arrow for WT, grey arrow for *Bdpmt-1*). Open symbols represent average lengths of the longest leaves, whereas closed symbols represent average culm height. Vertical bars are standard deviations. Note that, with this particular experiment, *Bdpmt-1* culms emerged later from the leaf whorl than did WT culms. However, this is not always the case (sometimes average culm emergence occurs at the same time or earlier). Note that *Bdpmt-1* culms grow to be about the same heights as WT, which is usually the case for WT and *Bdpmt-1* and RNAi mutant plants grown side by side in our controlled growth chambers (20 h/day light at 200-250  $\mu\text{mol m}^{-2} \text{s}^{-1}$ , 22 °C). n=51.

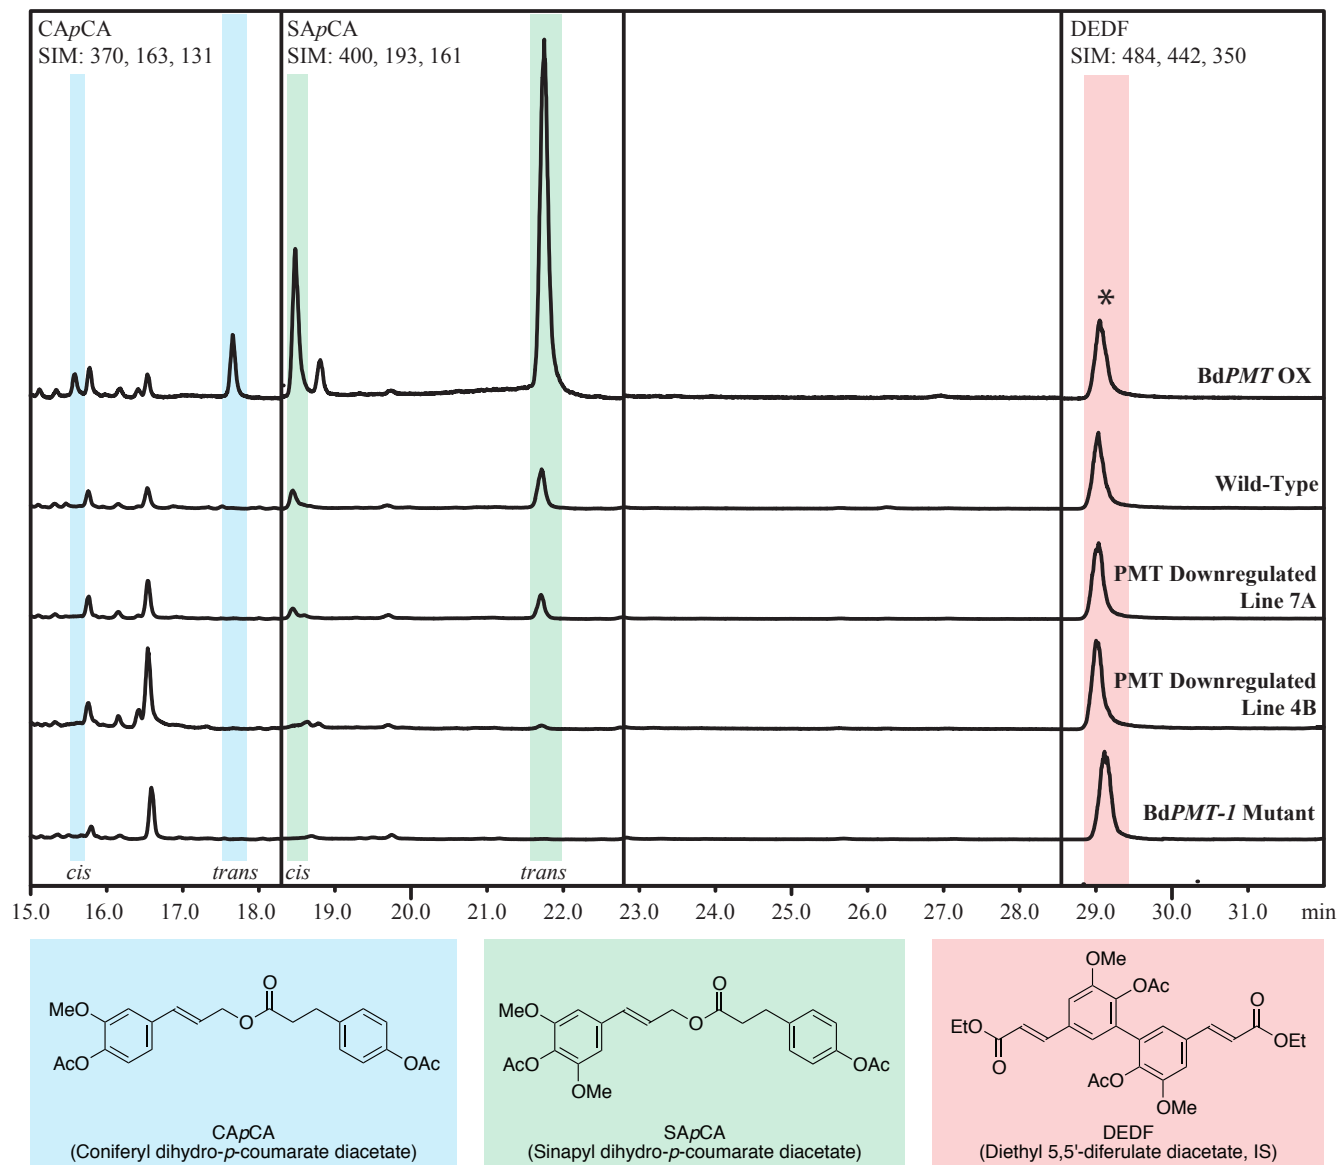

**Figure S3.** Partial GC-SIM traces of the diacetylated monolignol conjugates generated by DFRC treatment of extractive-free senesced stems from (top to bottom) *BdPMT* overexpressed (*BdPMT* OX), wild-type (WT), *BdPMT* downregulated line 7A (*PMT* RNAi line 7A), *BdPMT* downregulated line 4B (*PMT* RNAi line 4B), and *BdPMT-1* mutant. \* = internal standard peaks.

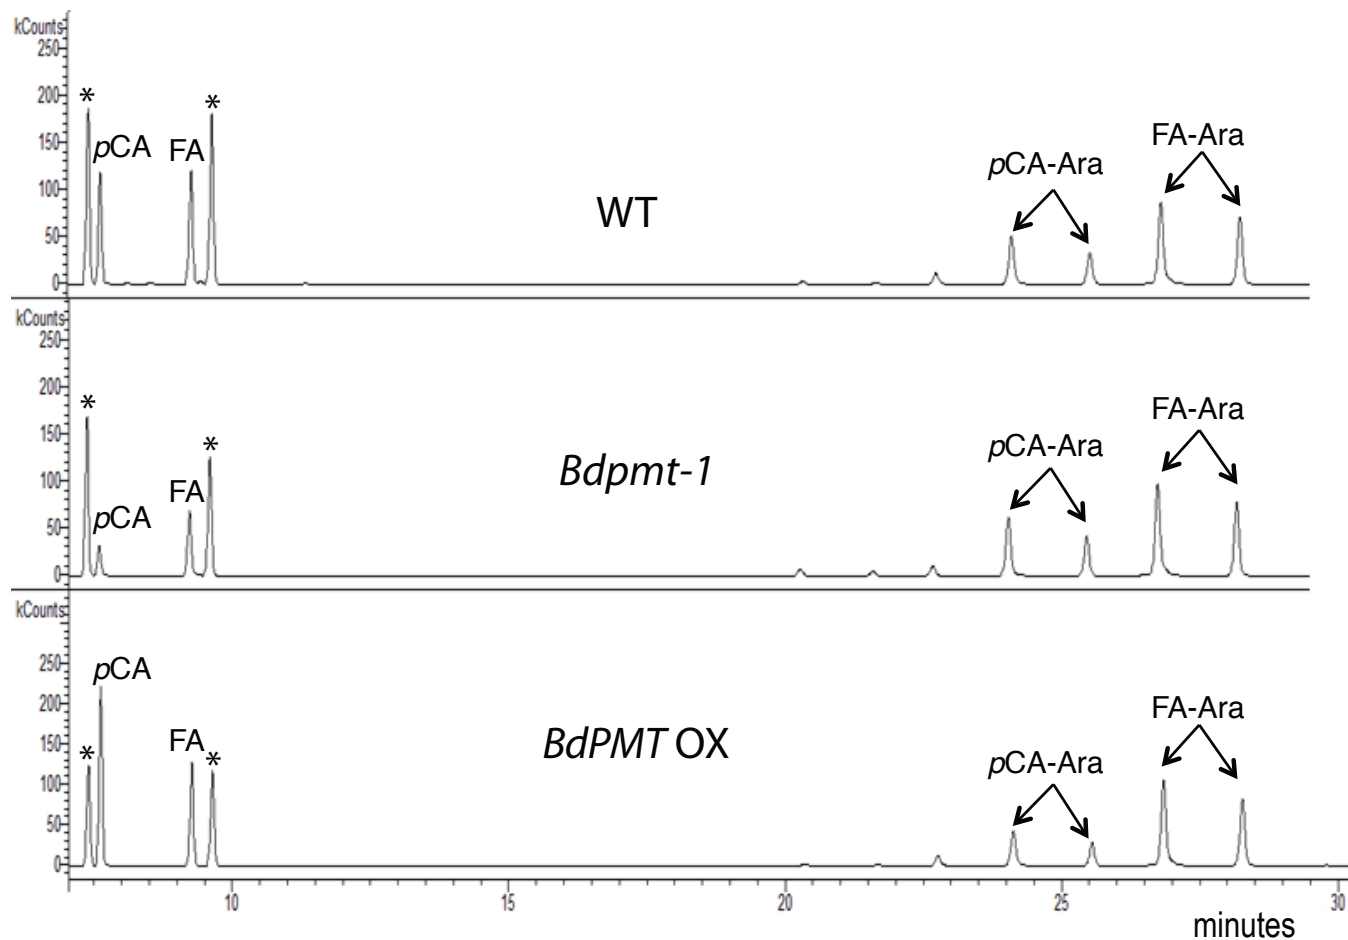

**Figure S4.** Partial GC-MS traces of phenolics recovered by mild acidolysis of extractive-free senesced stems from wild-type (WT) and *BdPMT* misregulated lines (*Bdpmt-1* mutant and *BdPMT* overexpressor *BdPMT OX*). *p*-Coumaric acid (*p*CA), ferulic acid (FA), *p*-coumaroylated arabinose (*p*CA-Ara, 2 anomers) and feruloylated arabinose (FA-Ara, 2 anomers) are analyzed as their TMS derivatives. \* = internal standard peaks.

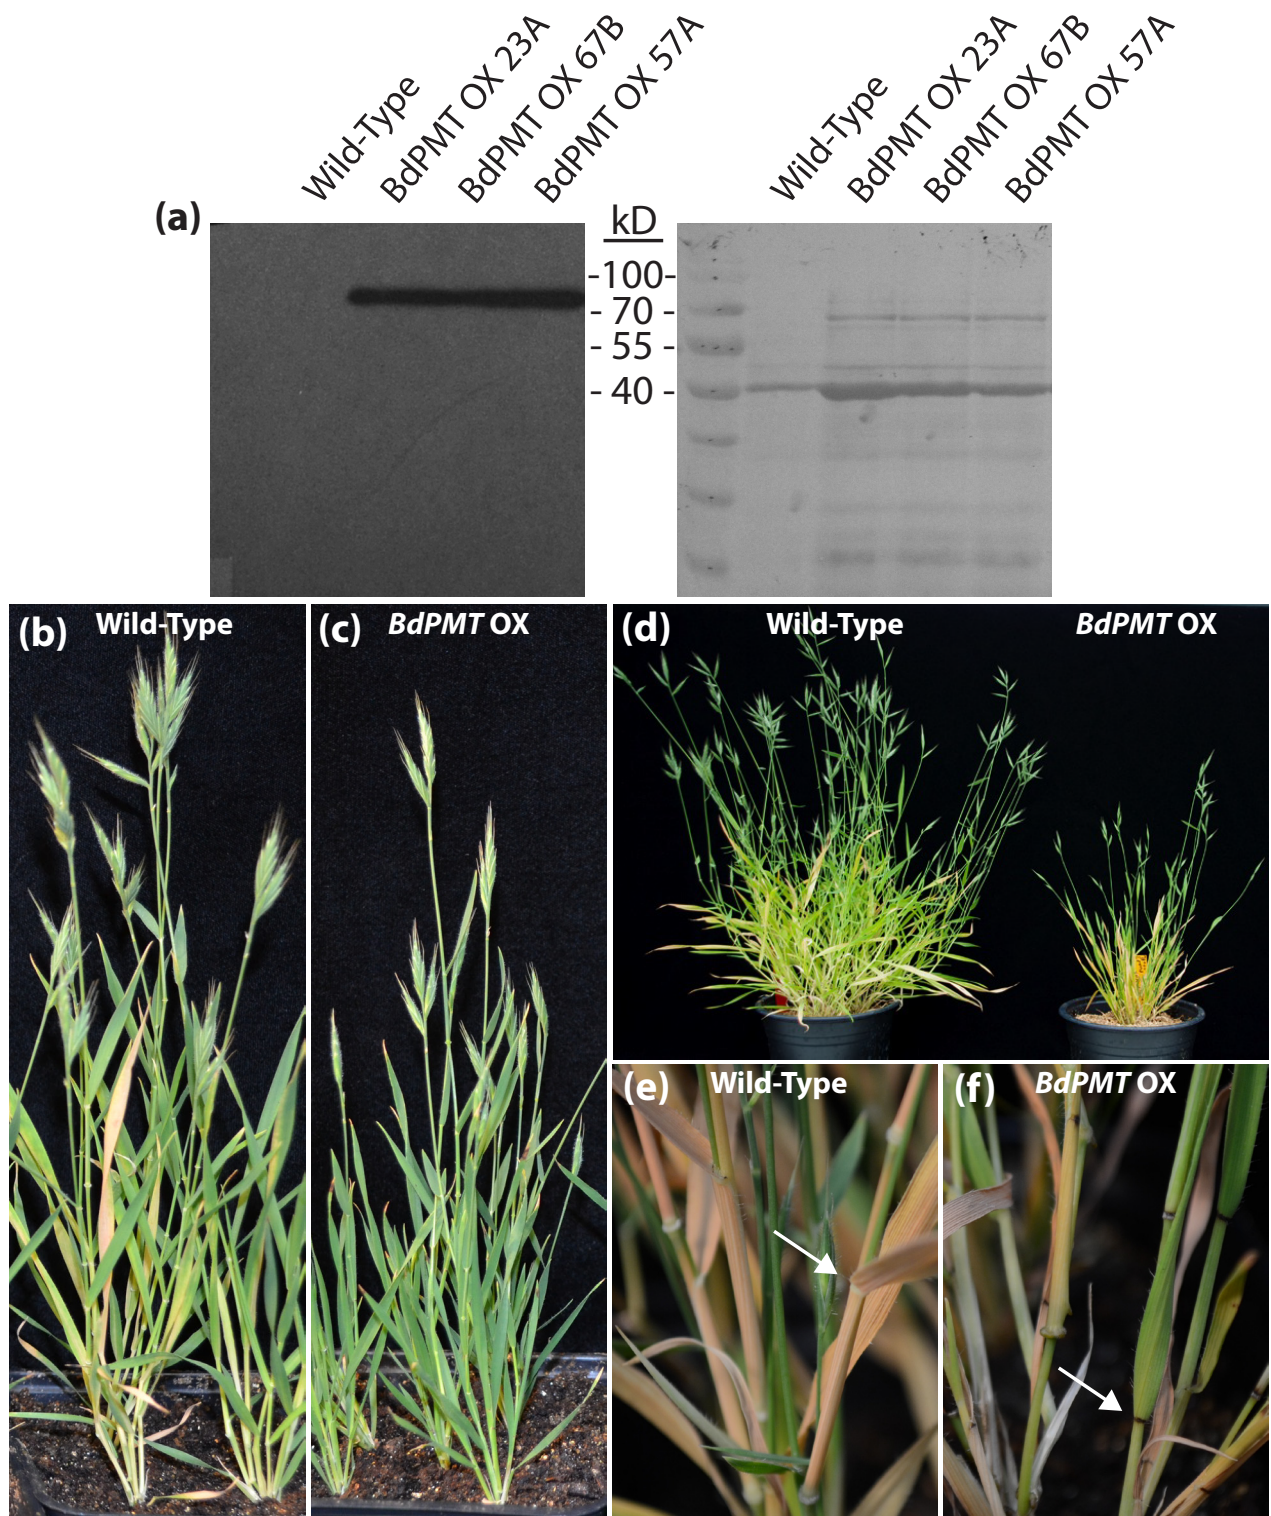

**Figure S5.** Western blot analysis of *BdPMT OX* expression, and growth phenotypes of *BdPMT OX* plants. (a) Western blot analysis of *EYFP:BdPMT* transgenic plant extracts (three independent lines *BdPMT OX* 23A, 67B, and 57A) probed with an anti-GFP antibody, which detected a band of the expected 80 kiloDalton (kD) size (blot image on left; image on right is the same blot protein-stained with amido black). (b-f) Images of WT (b, d, e) and *BdPMT OX* (c, d, f) plant phenotypes. (b, c) In growth chambers with tightly controlled conditions, WT (b) and *BdPMT OX* (c) plants grew to similar sizes. (d) Under greenhouse growth conditions, which were variable, *BdPMT OX* plants grew smaller than WT. (e, f) Leaf collars (delineated by arrows) of *BdPMT OX* plants (f) typically became blackened and the leaf blades grew alongside the culms, whereas WT leaf collars (e) never blackened and WT leaves grew at about 60 degree angles from the culms (these phenotypes were observed in both growth chamber and greenhouse conditions).

**Table S1.** Classes of genes predicted by PlaNet to be co-expressed with Bradi2g36910.1 (*BdPMT*).  
<http://aranet.mpimp-golm.mpg.de/index.html>

| Mapman termID | Term description                                                                                      | Terms in NVN | Terms on microarray | p-value |
|---------------|-------------------------------------------------------------------------------------------------------|--------------|---------------------|---------|
| 11.10.1       | lipid metabolism.glycolipid synthesis.MGDG synthase                                                   | 1            | 3                   | 0.01    |
| 13.1.6.3.1    | amino acid metabolism.synthesis.aromatic aa.phenylalanine.arogenate dehydratase / prephenate dehydrat | 1            | 6                   | 0.03    |
| 16            | secondary metabolism                                                                                  | 7            | 350                 | 0.01    |
| 16.2          | secondary metabolism.phenylpropanoids                                                                 | 6            | 115                 | 0       |
| 16.2.1        | secondary metabolism.phenylpropanoids.lignin biosynthesis                                             | 4            | 39                  | 0       |
| 16.2.1.1      | secondary metabolism.phenylpropanoids.lignin biosynthesis.PAL                                         | 2            | 8                   | 0       |
| 16.2.1.10     | secondary metabolism.phenylpropanoids.lignin biosynthesis.CAD                                         | 1            | 7                   | 0.03    |
| 16.2.1.3      | secondary metabolism.phenylpropanoids.lignin biosynthesis.4CL                                         | 1            | 16                  | 0.05    |
| 17            | hormone metabolism                                                                                    | 7            | 395                 | 0.02    |
| 17.5          | hormone metabolism.ethylene                                                                           | 4            | 117                 | 0.01    |
| 17.5.3        | hormone metabolism.ethylene.induced-regulated-responsive-activated                                    | 2            | 16                  | 0.01    |
| 17.7.1.5      | hormone metabolism.jasmonate.synthesis-degradation.12-Oxo-PDA-reductase                               | 1            | 11                  | 0.04    |
| 20.2.3        | stress.abiotic.drought/salt                                                                           | 2            | 46                  | 0.04    |
| 26.21         | misc.protease inhibitor/seed storage/lipid transfer protein (LTP) family protein                      | 2            | 37                  | 0       |
| 27.3          | RNA.regulation of transcription                                                                       | 22           | 2052                | 0.01    |
| 27.3.13       | RNA.regulation of transcription.CCAAT box binding factor family, DR1                                  | 1            | 2                   | 0.02    |
| 27.3.14       | RNA.regulation of transcription.CCAAT box binding factor family, HAP2                                 | 1            | 5                   | 0.04    |
| 27.3.22       | RNA.regulation of transcription.HB,Homeobox transcription factor family                               | 3            | 75                  | 0.04    |
| 27.3.25       | RNA.regulation of transcription.MYB domain transcription factor family                                | 3            | 114                 | 0.04    |
| 27.3.4        | RNA.regulation of transcription.ARF, Auxin Response Factor family                                     | 2            | 21                  | 0.01    |
| 27.3.5        | RNA.regulation of transcription.ARR                                                                   | 2            | 17                  | 0.01    |
| 3.2.1         | minor CHO metabolism.trehalose.TPS                                                                    | 1            | 8                   | 0.04    |
| 31            | cell                                                                                                  | 9            | 651                 | 0.01    |
| 31.1          | cell.organisation                                                                                     | 8            | 352                 | 0       |
| 33            | development                                                                                           | 8            | 484                 | 0.02    |
| 33.99         | development.unspecified                                                                               | 7            | 409                 | 0.02    |
| 34            | transport                                                                                             | 15           | 1010                | 0       |
| 34.13         | transport.peptides and oligopeptides                                                                  | 7            | 108                 | 0       |
| 34.3          | transport.amino acids                                                                                 | 3            | 85                  | 0.01    |
| 34.6          | transport.sulphate                                                                                    | 2            | 10                  | 0       |

List of genes predicted to co-express with Bradi2g36910 (*BdPMT*). Highlighted in yellow are known and putative lignin biosynthesis genes.

| Gene ID        | Description                                                                                     |      |
|----------------|-------------------------------------------------------------------------------------------------|------|
| Bradi4g38780.1 | gibberellin 20 oxidase 2, putative, expressed                                                   |      |
| Bradi2g37377.1 | MYB family transcription factor, putative, expressed                                            |      |
| Bradi5g20700.1 | WRKY68, expressed                                                                               |      |
| Bradi2g55340.1 | transmembrane amino acid transporter protein, putative, expressed                               |      |
| Bradi1g75220.1 | Citrate transporter protein, putative, expressed                                                |      |
| Bradi3g59510.1 | protein kinase domain containing protein, expressed                                             |      |
| Bradi2g26760.1 | annexin, putative, expressed                                                                    |      |
| Bradi1g58380.1 | ERD4 protein, putative, expressed                                                               |      |
| Bradi3g37650.1 | 12_oxophytodienoate reductase, putative, expressed                                              |      |
| Bradi3g13237.1 | transferase family protein, putative, expressed                                                 |      |
| Bradi1g01870.1 | pirin, putative, expressed                                                                      |      |
| Bradi1g31850.1 | cell cycle control protein, putative, expressed                                                 |      |
| Bradi3g11470.4 | ras_related protein, putative, expressed                                                        |      |
| Bradi1g45487.1 | annexin, putative, expressed                                                                    |      |
| Bradi1g21490.1 | zinc_finger protein, putative, expressed                                                        |      |
| Bradi3g16670.1 | peptide transporter PTR2, putative, expressed                                                   |      |
| Bradi3g25607.1 | expressed protein                                                                               |      |
| Bradi4g32190.1 | EF hand family protein, putative, expressed                                                     |      |
| Bradi4g44530.1 | peroxidase precursor, putative, expressed                                                       |      |
| Bradi2g55730.1 | cytochrome P450, putative, expressed                                                            |      |
| Bradi2g59400.1 | exostosin family domain containing protein, expressed                                           |      |
| Bradi2g11380.1 | polygalacturonase, putative, expressed                                                          |      |
| Bradi3g30670.1 | dehydration response related protein, putative, expressed                                       |      |
| Bradi3g54320.1 | expressed protein                                                                               |      |
| Bradi2g10630.1 | expressed protein                                                                               |      |
| Bradi4g21050.1 | ANTH domain containing protein, expressed                                                       |      |
| Bradi3g00590.1 | auxin_induced protein 5NG4, putative, expressed                                                 |      |
| Bradi1g07700.1 | subtilisin_like protease, putative, expressed                                                   |      |
| Bradi1g32920.1 | nodulin MtN3 family protein, putative, expressed                                                |      |
| Bradi3g51387.1 | aquaporin protein, putative, expressed                                                          |      |
| Bradi2g59410.1 | exostosin family domain containing protein, expressed                                           |      |
| Bradi1g50050.1 | lung seven transmembrane domain containing protein, putative, expressed                         |      |
| Bradi3g47950.1 | expressed protein                                                                               |      |
| Bradi3g54387.1 | monogalactosyldiacylglycerol synthase, putative, expressed                                      |      |
| Bradi3g32180.1 | expressed protein                                                                               |      |
| Bradi2g23450.1 | membrane associated DUF588 domain containing protein, putative, expressed                       |      |
| Bradi2g61350.1 | RNA recognition motif containing protein, putative, expressed                                   |      |
| Bradi2g62670.1 | senescence_induced receptor_like serine/threonine_protein kinase precursor, putative, expressed |      |
| Bradi2g27060.1 | golgi transport complex protein_related, putative, expressed                                    |      |
| Bradi3g36887.1 | cinnamoyl_CoA reductase, putative, expressed                                                    | CCR1 |
| Bradi3g29970.1 | hydrolase, alpha/beta fold family domain containing protein, expressed                          |      |
| Bradi4g31460.1 | HD domain containing protein, putative, expressed                                               |      |
| Bradi5g12460.1 | uncharacterized Cys_rich domain containing protein, putative, expressed                         |      |
| Bradi1g64920.1 | pathogenesis_related Bet v I family protein, putative, expressed                                |      |
| Bradi1g70650.1 | natural resistance_associated macrophage protein, putative, expressed                           |      |
| Bradi3g05750.1 | AMP_binding domain containing protein, expressed                                                | 4CL  |

|                       |                                                                                   |             |
|-----------------------|-----------------------------------------------------------------------------------|-------------|
| <b>Bradi2g21300.1</b> | <b>cytochrome P450, putative, expressed</b>                                       | <b>C3H</b>  |
| Bradi1g74420.1        | sulfate transporter, putative, expressed                                          |             |
| Bradi1g33230.1        | expressed protein                                                                 |             |
| Bradi2g02600.1        | PB1 domain containing protein, expressed                                          |             |
| Bradi1g51200.1        | sulfate transporter, putative, expressed                                          |             |
| Bradi1g10580.1        | LTPL118 _ Protease inhibitor/seed storage/LTP family protein precursor, expressed |             |
| Bradi5g25860.1        | OsRR6 type_A response regulator, expressed                                        |             |
| Bradi1g06800.1        | tubulin/FtsZ domain containing protein, putative, expressed                       |             |
| Bradi2g17982.1        | myb_like DNA_binding domain containing protein, putative, expressed               |             |
| Bradi5g00700.1        | ethylene receptor, putative, expressed                                            |             |
| Bradi5g09030.1        | prephenate dehydratase domain containing protein, expressed                       |             |
| Bradi3g38060.1        | gibberellin receptor GID1L2, putative, expressed                                  |             |
| <b>Bradi3g16530.1</b> | <b>O_methyltransferase, putative, expressed</b>                                   | <b>COMT</b> |
| Bradi1g71680.2        | LTPL69 _ Protease inhibitor/seed storage/LTP family protein precursor, expressed  |             |
| Bradi5g19960.1        | RING_H2 finger protein ATL5G, putative, expressed                                 |             |
| Bradi2g46810.1        | expressed protein                                                                 |             |
| Bradi2g58020.1        | two_component response regulator, putative, expressed                             |             |
| Bradi1g54280.1        | expressed protein                                                                 |             |
| Bradi4g21790.1        | peptide transporter PTR2, putative, expressed                                     |             |
| Bradi1g68280.1        | actin_depolymerizing factor, putative, expressed                                  |             |
| Bradi4g26750.1        | expressed protein                                                                 |             |
| Bradi2g61070.1        | NADPH quinone oxidoreductase, putative, expressed                                 |             |
| Bradi2g38590.1        | CGMC_GSK.6 _ CGMC includes CDA, MAPK, GSK3, and CLKC kinases, expressed           |             |
| Bradi1g65750.1        | glycosyltransferase family 43 protein, putative, expressed                        |             |
| Bradi2g26770.1        | annexin, putative, expressed                                                      |             |
| Bradi3g41420.1        | zinc finger DHHC domain_containing protein, putative, expressed                   |             |
| Bradi4g41990.1        | harpin_induced protein 1 domain containing protein, expressed                     |             |
| Bradi3g34930.1        | histone_like transcription factor and archaeal histone, putative, expressed       |             |
| Bradi1g29560.1        | pollen signalling protein with adenyl cyclase activity, putative, expressed       |             |
| Bradi1g54037.1        | DUF630/DUF632 domains containing protein, putative, expressed                     |             |
| Bradi3g13420.1        | esterase, putative, expressed                                                     |             |
| Bradi2g12150.2        | S_adenosylmethionine synthetase, putative, expressed                              |             |
| Bradi1g75940.1        | protein phosphatase 2C, putative, expressed                                       |             |
| Bradi4g21220.1        | auxin_induced protein 5NG4, putative, expressed                                   |             |
| Bradi4g42290.1        | expressed protein                                                                 |             |
| Bradi1g00840.1        | avr9/Cf_9 rapidly elicited protein, putative, expressed                           |             |
| Bradi1g26110.1        | expressed protein                                                                 |             |
| <b>Bradi5g14720.1</b> | <b>transferase family protein, putative, expressed</b>                            | <b>HCT</b>  |
| Bradi1g33160.1        | auxin response factor 18, putative, expressed                                     |             |
| Bradi1g06290.1        | fasciclin domain containing protein, expressed                                    |             |
| Bradi2g25470.1        | alpha/beta hydrolase fold, putative, expressed                                    |             |
| Bradi4g13670.1        | patatin, putative, expressed                                                      |             |
| <b>Bradi3g49260.1</b> | <b>phenylalanine ammonia_lyase, putative, expressed</b>                           | <b>PAL</b>  |
| Bradi5g27687.1        | peroxidase precursor, putative, expressed                                         |             |
| Bradi3g51510.1        | dof zinc finger domain containing protein, putative, expressed                    |             |
| Bradi2g22560.1        | DUF640 domain containing protein, putative, expressed                             |             |
| Bradi2g44110.1        | No annotation                                                                     |             |
| Bradi4g40570.1        | amino acid transporter, putative, expressed                                       |             |
| Bradi1g71740.1        | ethylene_responsive transcription factor, putative, expressed                     |             |
| Bradi1g00710.1        | expressed protein                                                                 |             |
| Bradi3g45160.1        | harpin_induced protein 1 domain containing protein, expressed                     |             |
| Bradi2g20687.1        | serine/threonine_protein kinase receptor precursor, putative, expressed           |             |
| Bradi2g37950.1        | tetraspanin family protein, putative, expressed                                   |             |
| Bradi3g23167.1        | expressed protein                                                                 |             |
| Bradi4g21890.1        | NB_ARC domain containing protein, expressed                                       |             |
| Bradi1g13680.1        | nuclear transcription factor Y subunit, putative, expressed                       |             |
| Bradi1g60852.1        | expressed protein                                                                 |             |
| Bradi3g52790.1        | basic helix_loop_helix, putative, expressed                                       |             |
| Bradi5g22842.1        | NBS_LRR disease resistance protein, putative, expressed                           |             |
| Bradi2g12370.1        | GDSL_like lipase/acylhydrolase, putative, expressed                               |             |
| Bradi2g47590.1        | MYB family transcription factor, putative, expressed                              |             |
| Bradi1g11760.1        | zinc finger family protein, putative, expressed                                   |             |
| Bradi5g10920.1        | peptide transporter PTR2, putative, expressed                                     |             |
| Bradi2g54940.1        | homeodomain protein, putative, expressed                                          |             |
| Bradi1g30160.1        | receptor protein kinase CLAVATA1 precursor, putative, expressed                   |             |
| Bradi1g21410.1        | expressed protein                                                                 |             |
| Bradi2g56970.1        | amino acid transporter, putative, expressed                                       |             |
| Bradi3g10120.1        | expressed protein                                                                 |             |
| Bradi2g43690.1        | oxidoreductase, aldo/keto reductase family protein, putative, expressed           |             |
| Bradi5g22920.1        | ethylene_responsive protein related, putative, expressed                          |             |
| Bradi4g29730.1        | trehalose synthase, putative, expressed                                           |             |
| Bradi4g34300.1        | membrane protein, putative, expressed                                             |             |
| Bradi1g50280.1        | expressed protein                                                                 |             |
| Bradi2g20415.1        | MATH domain containing protein, expressed                                         |             |
| Bradi1g44510.1        | B12D protein, putative, expressed                                                 |             |
| Bradi3g17077.1        | expressed protein                                                                 |             |
| Bradi1g03500.1        | peptide transporter PTR2, putative, expressed                                     |             |
| Bradi1g11090.1        | GRAS family transcription factor domain containing protein, expressed             |             |
| <b>Bradi3g06480.1</b> | <b>dehydrogenase, putative, expressed</b>                                         | <b>CAD</b>  |
| Bradi4g03680.1        | heparanase_like protein precursor, putative, expressed                            |             |
| Bradi2g36910.1        | transferase family protein, putative, expressed                                   |             |
| Bradi2g52470.1        | ICE_like protease p20 domain containing protein, putative, expressed              |             |
| Bradi4g34040.1        | CHIT13 _ Chitinase family protein precursor, expressed                            |             |
| Bradi2g50200.1        | RING_H2 finger protein, putative, expressed                                       |             |



|                       |                                                                                                 |            |
|-----------------------|-------------------------------------------------------------------------------------------------|------------|
| Bradi2g37100.1        | ankyrin repeat domain_containing protein 28, putative, expressed                                |            |
| Bradi2g25417.1        | peptide transporter PTR2, putative, expressed                                                   |            |
| Bradi3g09000.1        | spotted leaf 11, putative, expressed                                                            |            |
| Bradi4g39780.1        | peptide transporter PTR3_A, putative, expressed                                                 |            |
| Bradi1g72350.1        | glycosyl transferase, putative, expressed                                                       |            |
| Bradi1g17830.1        | potassium transporter, putative, expressed                                                      |            |
| Bradi3g40850.1        | ras_related protein, putative, expressed                                                        |            |
| <b>Bradi3g49250.2</b> | <b>phenylalanine ammonia_lyase, putative, expressed</b>                                         | <b>PAL</b> |
| Bradi1g05430.2        | BHLH transcription factor, putative, expressed                                                  |            |
| Bradi2g58310.1        | No annotation                                                                                   |            |
| Bradi3g04920.1        | auxin response factor 6, putative, expressed                                                    |            |
| Bradi2g23530.1        | homeodomain protein, putative, expressed                                                        |            |
| Bradi1g67100.1        | OsWLM2 _ LIM domain protein, putative actin_binding protein and transcription factor, expressed |            |
| Bradi2g56397.1        | proton_dependent oligopeptide transport, putative, expressed                                    |            |
| Bradi3g52800.1        | bg55, putative, expressed                                                                       |            |
| Bradi2g35440.1        | lipase, putative, expressed                                                                     |            |
| Bradi5g23340.1        | transcription factor, putative, expressed                                                       |            |
| Bradi1g23470.1        | ZOS7_06 _ C2H2 zinc finger protein, expressed                                                   |            |
| Bradi2g51990.1        | bHelix_loop_helix transcription factor, putative, expressed                                     |            |
| Bradi5g10210.1        | OsSub41 _ Putative Subtilisin homologue, expressed                                              |            |
| Bradi4g40400.1        | plant_specific domain TIGR01627 family protein, expressed                                       |            |
| Bradi2g53390.1        | homeobox domain containing protein, expressed                                                   |            |
| Bradi1g10150.1        | tubulin/FtsZ domain containing protein, putative, expressed                                     |            |
| Bradi3g36460.1        | RAD23 DNA repair protein, putative, expressed                                                   |            |
| Bradi3g58560.1        | plastocyanin_like domain containing protein, putative, expressed                                |            |

The node vicinity network below contains the query gene (light blue) and all genes two steps away from the query gene.

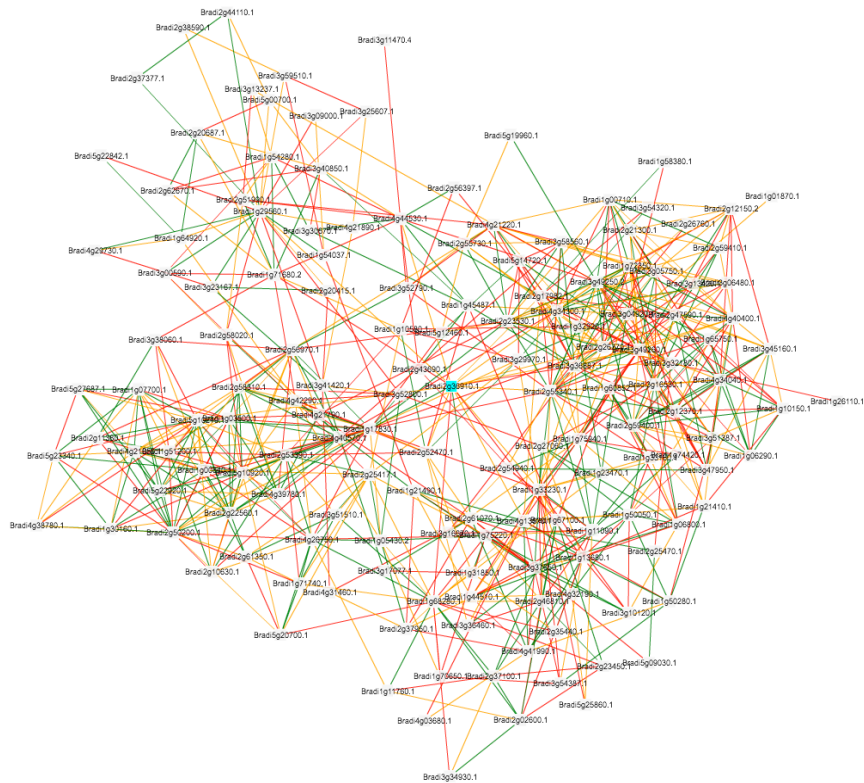

**Table S2.** Impact of misregulating the *BdPMT* gene on *BdPMT* transcript levels and on the amount of *p*-coumaric acid (*p*CA) and ferulic acid (FA) released by mild alkaline hydrolysis.

| Genotype       | <i>BdPMT</i> transcript level<br>(n, SD) <sup>a</sup> | Mild alkaline hydrolysis <sup>b</sup> |              |
|----------------|-------------------------------------------------------|---------------------------------------|--------------|
|                |                                                       | <i>p</i> CA(mg/g)                     | FA (mg/g)    |
| WT             | ND                                                    | 7.34 ± 0.30                           | 4.06 ± 0.10  |
| <i>Bdpmt-1</i> | ND                                                    | 1.63 ± 0.09**                         | 3.03 ± 0.41* |
| WT             | 1 (4, 0.06)                                           | 6.40 ± 0.26                           | 8.62 ± 0.41  |
| RNAi#2 4B      | 0.08 (3, 0.04)**                                      | 3.14 ± 0.18**                         | 8.31 ± 0.58  |
| RNAi#2 7A      | 0.25 (6, 0.07)**                                      | 5.04 ± 0.29**                         | 8.64 ± 0.65  |
| WT             | 1 (5, 0.00)                                           | 5.55 ± 0.13                           | 6.24 ± 0.30  |
| RNAi#1 1A      | 0.42 (15, 0.03)**                                     | 4.77 ± 0.38*                          | 6.40 ± 0.47  |
| RNAi#1 8A      | 0.47 (12, 0.03)*                                      | 5.39 ± 0.54                           | 6.04 ± 0.14  |
| WT             | 1 (3, 0.01)                                           | 7.45 ± 0.83                           | 5.42 ± 0.48  |
| Empty vector   | ND                                                    | 7.56 ± 0.41                           | 5.09 ± 0.44  |
| PMT OX 23A     | 34.82 (7, 6.72)**                                     | 16.16 ± 1.07**                        | 7.14 ± 0.69* |
| PMT OX 57A     | 55.78 (12, 15.06)**                                   | 17.33 ± 0.61**                        | 7.12 ± 0.17* |
| PMT OX 67B     | ND                                                    | 16.37 ± 1.14*                         | 6.38 ± 0.52  |

ND: not determined. Asterisks denote statistically significant differences (Student's test) compared to the corresponding WT plants grown alongside (\*:  $p < 0.02$ ; \*\*:  $p < 0.0001$ ).

<sup>a</sup>Quantitative real-time PCR analyses were run on the top 2 internodes collected when the inflorescences were fully elongated but before seed fill had occurred. Transcript level values for misregulated plants are expressed relative to the corresponding WT value normalized to one. In parentheses are the number of individually analyzed plants, *n*, and the standard deviation of the ratio of gene expression. <sup>b</sup>Mild alkaline hydrolyses were run on extract-free senesced stems. Data are mean values ± SD.  $n \geq 3$ .

**Table S3.** Amount of DFRC-released *p*-coumaric acid (*p*CA) and amounts of *p*CA, ferulic acid (FA), *p*-coumaroylated arabinose (*p*CA-Ara) and feruloylated arabinose (FA-Ara) released by mild acidolysis of extract-free senesced stems.

| Genotype       | DFRC               | Mild acidolysis    |             |                        |               |
|----------------|--------------------|--------------------|-------------|------------------------|---------------|
|                | <i>p</i> CA (mg/g) | <i>p</i> CA (mg/g) | FA (mg/g)   | <i>p</i> CA-Ara (mg/g) | FA-Ara (mg/g) |
| WT             | 2.63 ± 0.60        | 0.64 ± 0.07        | 0.49 ± 0.06 | 2.94 ± 0.49            | 6.06 ± 0.74   |
| <i>Bdpmt-1</i> | 0.01 ± 0.02*       | 0.18 ± 0.03*       | 0.47 ± 0.09 | 3.21 ± 0.56            | 5.93 ± 0.57   |
| WT             | 1.20 ± 0.28        | 0.53 ± 0.09        | 0.53 ± 0.10 | 4.37 ± 0.34            | 8.35 ± 0.92   |
| RNAi#2 4B      | 0.10 ± 0.03*       | 0.25 ± 0.04*       | 0.54 ± 0.11 | 4.91 ± 0.50            | 8.52 ± 0.67   |
| RNAi#2 7A      | 0.60 ± 0.20*       | ND                 | ND          | ND                     | ND            |
| WT             | 2.31 ± 0.96        | 0.87 ± 0.05        | 0.90 ± 0.06 | 4.85 ± 0.44            | 8.53 ± 0.51   |
| PMT OX         | 7.98 ± 2.71*       | 1.84 ± 0.13*       | 1.15 ± 0.07 | 4.43 ± 0.40            | 11.57 ± 1.01* |

Values are means ± SD from individually analyzed plants (n≥3). Asterisks denote statistically significant differences (Student's test) compared to the corresponding wild-type (WT) values at p<0.001, except for RNAi#2 7A line where p<0.006. ND= not determined. Note that for the DFRC treatment, *p*CA is derived exclusively from lignin. For the Mild Acidolysis treatment, FA, *p*CA-Ara, and FA-Ara are derived exclusively from arabinoxylan, whereas *p*CA is derived from both lignin and arabinoxylan.

**Table S4.** Primer sequences and qRT-PCR amplification efficiencies.

| Primer name           | Purpose   | Amplicon Length | Sequence (5' - 3')                                 |
|-----------------------|-----------|-----------------|----------------------------------------------------|
| Bradi2g36910_RNAi#1_F | Cloning   | 301 bp          | GGGGGGTACCGGATCCGTAAGCAACGATCCATAATCG              |
| Bradi2g36910_RNAi#1_R |           |                 | GGGGACTAGTGGCGCGCCCCGTCTTAATTTTACCAGATG            |
| Bradi2g36910_RNAi#2_F |           | 258 bp          | GGGGGGTACCGGATCCTACGAGCTGACCTTCACCT                |
| Bradi2g36910_RNAi#2_R |           |                 | GGGGACTAGTGGCGCGCCTCACTTCCCGGCGGTGAAG              |
| Bradi2g36910_ORFBamF  |           | 1350 bp         | GAGAGGATCCGATGGAGAAGAAGTTCACGGTG                   |
| Bradi2g36910_ORFXhoR  |           |                 | GAGAACTAGTCTCGAGTCACTTCCCGGCGGTGAAGGCCA-<br>AGGCCG |
| pStarling_F1          | Screening | 470 bp          | CTTCATACGCTATTTATTTGCTTGGTA                        |
| pStarling_R1          |           |                 | TGACTTACCATGGATGATGTGTTTCTA                        |
| pStarling_F2          |           | 532 bp          | TCTGAATGGTCACAAGTCACATACAAT                        |
| pStarling_R2          |           |                 | GTGTTCTAAGCTAGCCTGGTAATAATC                        |
| PMT_qRTPCR_3F         | RT-qPCR   | 175 bp          | GGCGAGGCACCTTGATGGG                                |
| PMT_qRTPCR_3R2R       |           |                 | CCCGTCGGCGATGGTGTG                                 |
| BdUBC18for            |           | 196 bp          | ATCCCATGGAGGCACCTCAGGTC                            |
| BdUBC18rev            |           |                 | CGGTCATTGTCTTGCGGACGTTG                            |
| EF1a_Forward          |           | 150 bp          | CATGCCCTCCTTGCTTTCACCTT                            |
| EF1a_Reverse          |           |                 | AGGGTTGTAGCCGACCTTCTTGAG                           |

| Gene         | Locus        | Amplification efficiency $\pm$ SD |
|--------------|--------------|-----------------------------------|
| BdPMT        | Bradi2g36910 | 2.05 $\pm$ 0.19                   |
| UBC18        | Bradi4g00660 | 1.92 $\pm$ 0.09                   |
| EF1 $\alpha$ | Bradi1g06860 | 2.05 $\pm$ 0.01                   |
